# Supplementary material for: In Situ Partial Sulfidation for Preparing Cu/Cu2−xS Core/Shell Nanorods with Enhanced Photocatalytic Degradation
Source: MDPI journal article supplement (doi:10.3390/catal12020147), 2022-01-25
Supplement: s1 [file s1]

## Article

# In-situ partial sulfidation for preparing Cu/Cu<sub>2-x</sub>S core/shell nanorods with enhanced photocatalytic degradation

Li Cheng <sup>1</sup>, Yu-Ting Zhong <sup>2</sup>, Qu-Quan Wang <sup>1,\*</sup> and Li Zhou <sup>1,\*</sup>

<sup>1</sup> Key Laboratory of Artificial Micro- and Nano-structures of the Ministry of Education and Hubei Nuclear Solid Physics Key Laboratory, School of Physics and Technology, Wuhan University, Wuhan 430072, China

<sup>2</sup> School of Education, Jiangxi Science and Technology Normal University, Nanchang 330000, P. R. China

\* Correspondence: (L.Z.) zhouli@whu.edu.cn, (Q.Q.W.) qqwang@whu.edu.cn

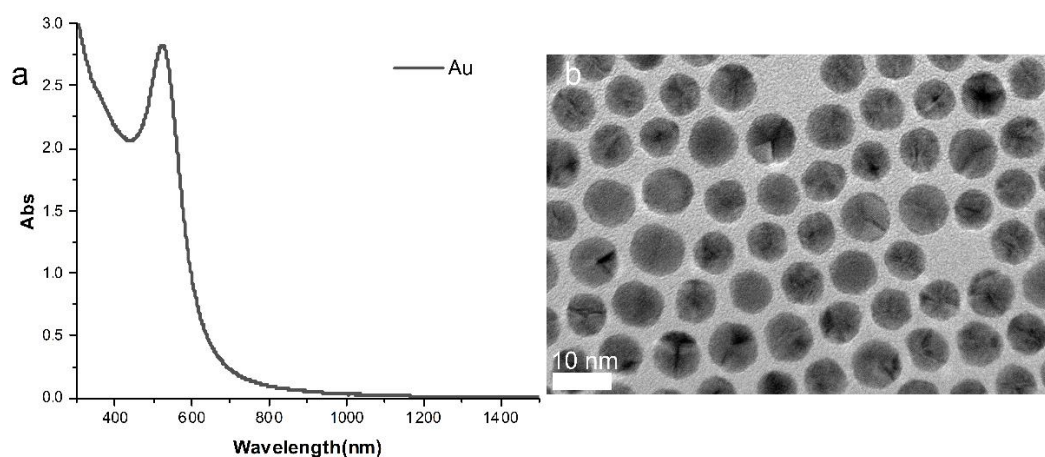

**Figure S1.** (a) Absorption spectrum and (b) TEM image of Au seeds.

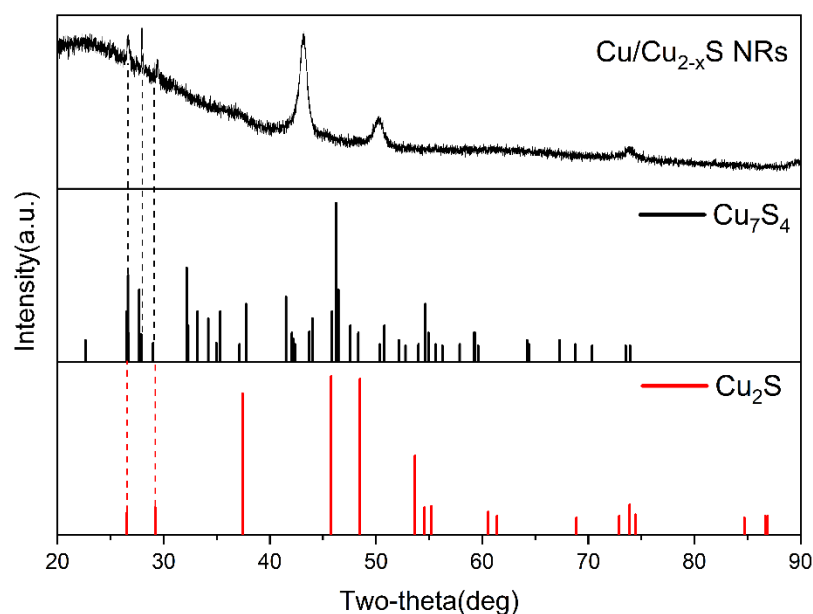

**Figure S2.** XRD patterns of Cu NRs after sulfidation. The bottom column diagram represents the standard diffraction pattern of Cu<sub>7</sub>S<sub>4</sub> (#33-0489), and Cu<sub>2</sub>S (#26-1116).

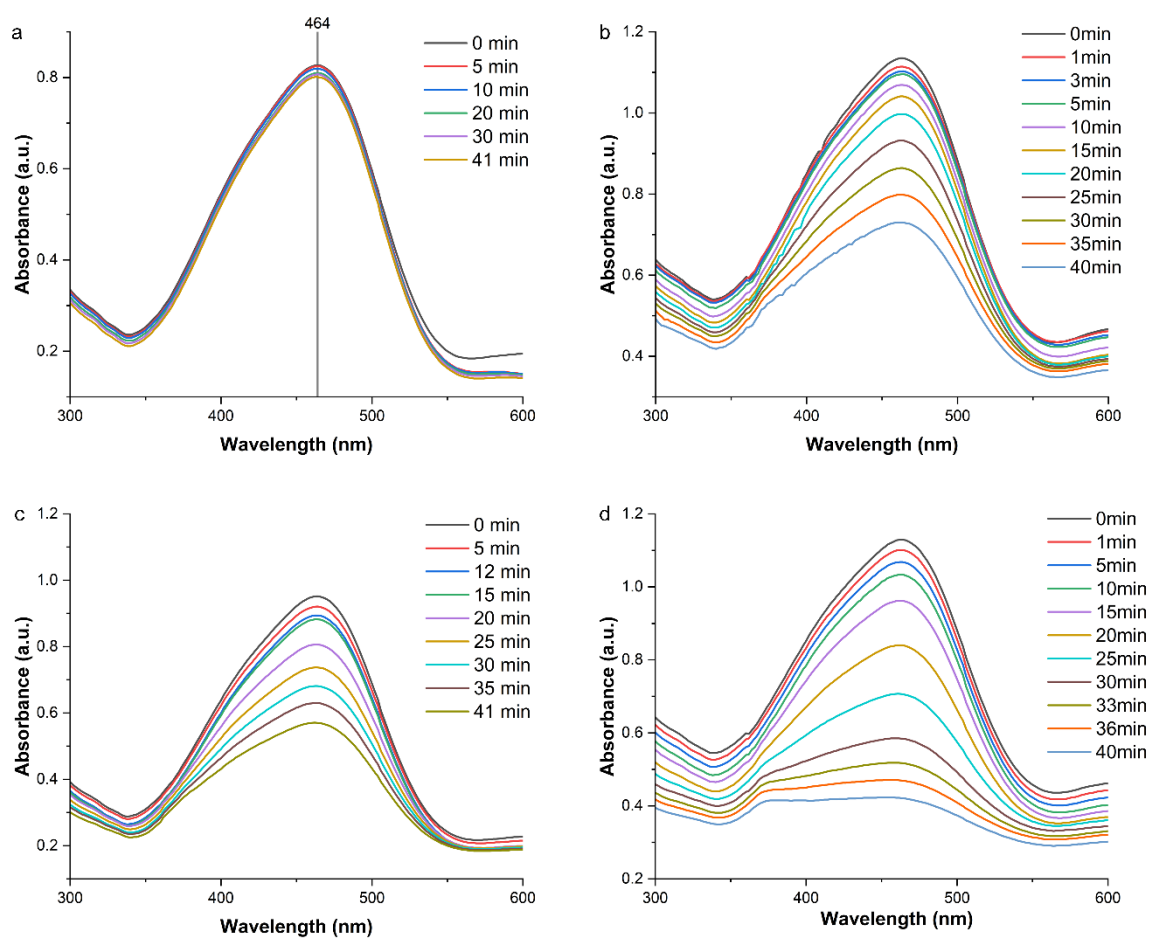

**Figure S3.** Absorption spectra of photocatalytic MO degradation by (a) Cu NRs under natural light, (b) Cu/Cu<sub>2-x</sub>S NRs under dark condition, (c) Cu/Cu<sub>2-x</sub>S NRs under natural light, and (d) Cu/Cu<sub>2-x</sub>S NRs under xenon lamp irradiation.

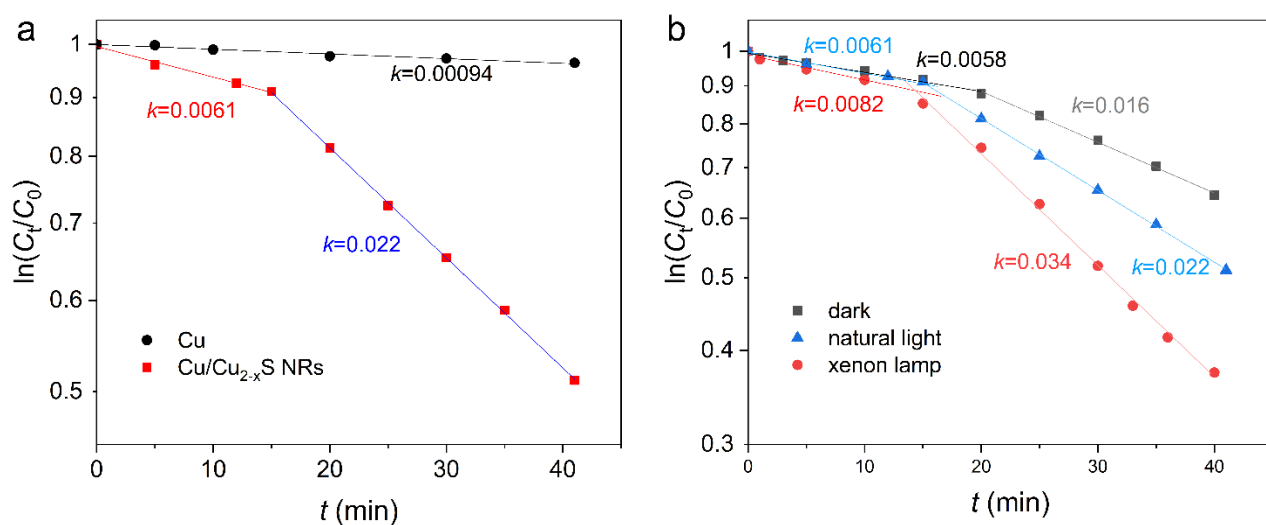

**Figure S4.** (a) Plot of  $\ln(C_t/C_0)$  vs. time for both Cu and Cu/Cu<sub>2-x</sub>S NRs. (b) Plot of  $\ln(C_t/C_0)$  vs. time for Cu/Cu<sub>2-x</sub>S NRs under the conditions of dark, natural light, and xenon lamp.

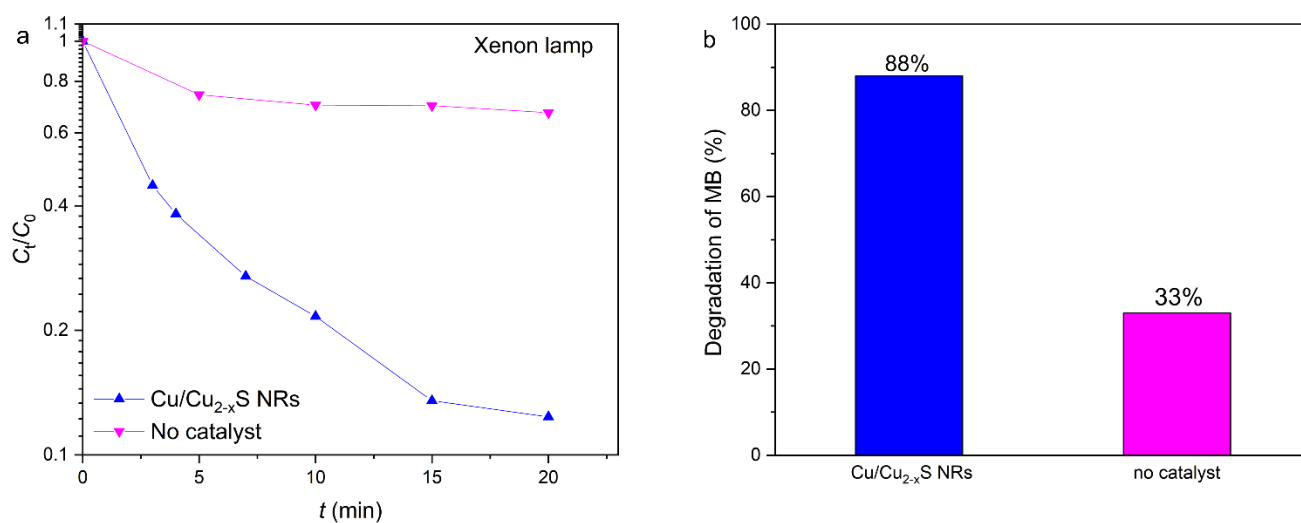

**Figure S5.** (a) Degradation curves and (b) degradation rate at 20 min for MB degradation by Cu/Cu<sub>2-x</sub>S NRs under xenon lamp irradiation. The reference sample with no catalyst is also presented. (b) Degradation rate at 20 min for MB degradation with and without Cu/Cu<sub>2-x</sub>S NRs. In this case of MB degradation, the photolysis of MB molecules under xenon lamp irradiation is observed.

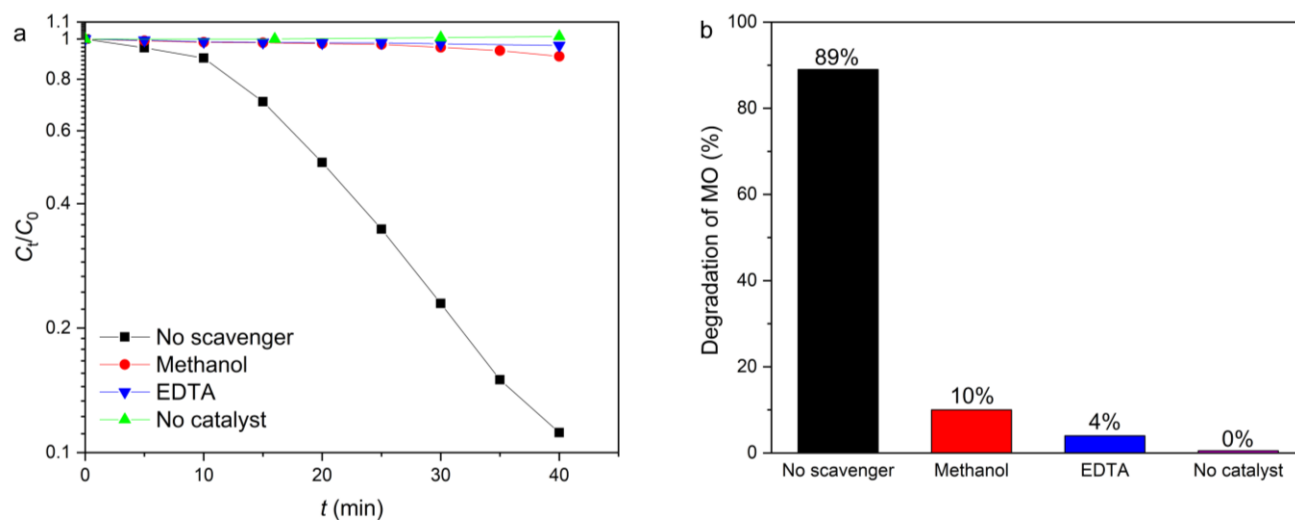

**Figure S6.** (a) Degradation curves and (b) degradation rate at 40 min for MO degradation by Cu/Cu<sub>2-x</sub>S NRs under xenon lamp irradiation. The radical scavengers of methanol and EDTA are added for examining the role of  $\cdot\text{OH}$  and  $h^+$ . The reference sample with no catalyst is also presented. The photolysis of MO molecules under xenon lamp irradiation is not observed.

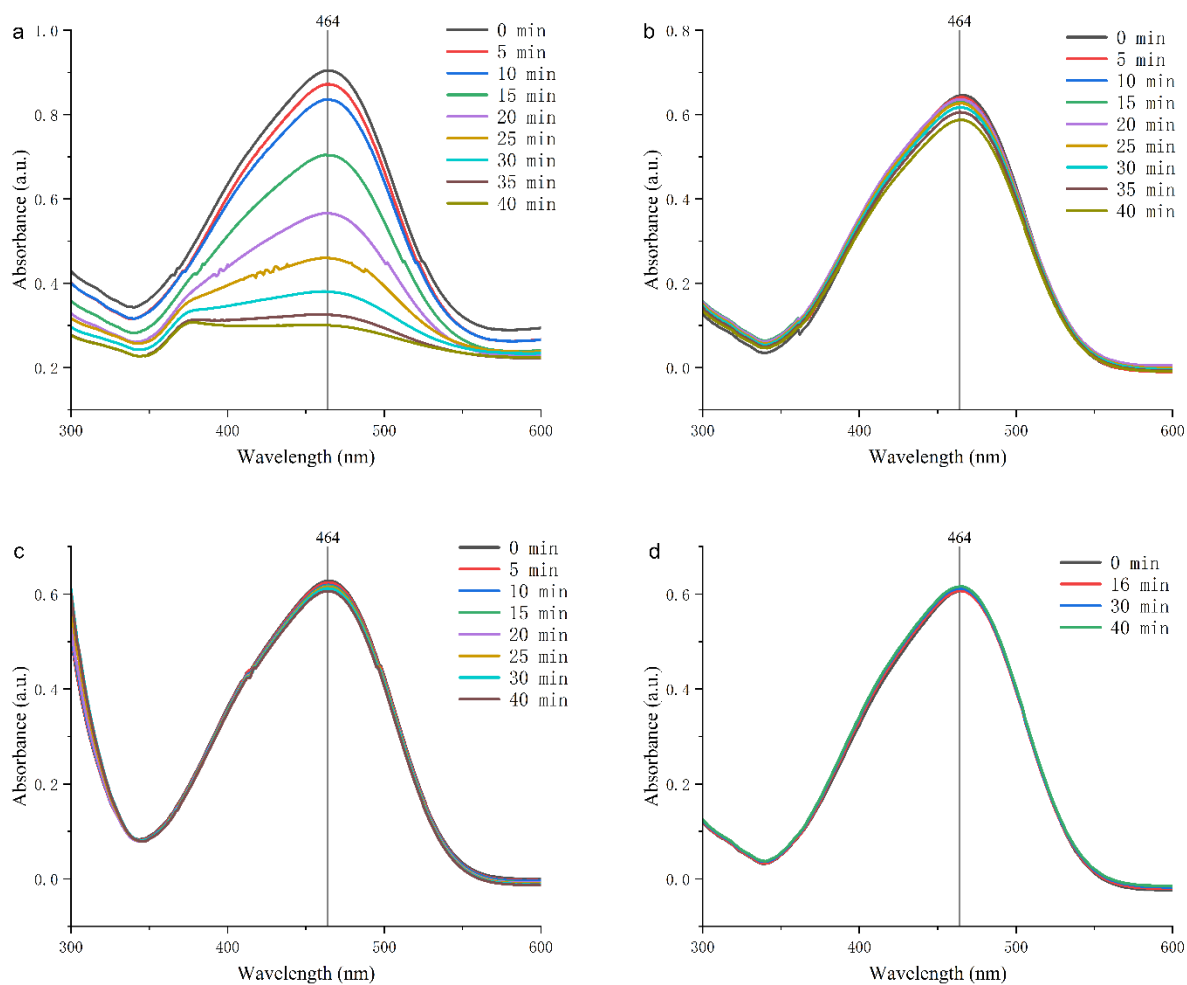

**Figure S7.** Absorption spectra of photocatalytic MO degradation by Cu/Cu<sub>2-x</sub>S NRs under xenon lamp irradiation: (a) without scavenger, (b) with methanol, (c) with EDTA, and (d) without catalyst of Cu/Cu<sub>2-x</sub>S NRs.

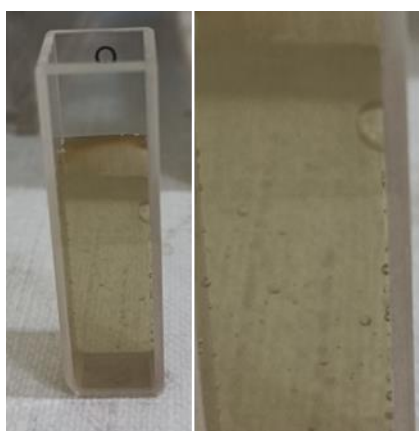

**Figure S8.** Photograph of MO degradation of by Cu/Cu<sub>2-x</sub>S NRs under natural light for 40 min. The generated bubbles due to MO degradation are clearly observed.
